# Supplementary material
Source: PubMed Central journal article supplement (PMC3127900)
Supplement: 1017029108_pnas.1017029108_SI.pdf [file 1017029108_pnas.1017029108_SI.pdf]

# Supporting Information

Mas et al. 10.1073/pnas.1017029108

## SI Text

**SI Experimental Procedures. Protein Expression and Purification.** The carboxyl-terminal domain of the alpha subunit of the general transcription factor IIE (TFII $\alpha$ CTD), the Pleckstrin homology domain of Tfb1 (Tfb1PH), and the Pleckstrin homology domain of p62 (p62PH) were purified as previously described (1). The minimal transactivation domain of EKLf (EKLFTAD), EKLFTAD1, EKLFTAD2 and CREB-binding protein (CBP)/p300 I $\beta$ id domain were expressed as GST-fusion proteins in *Escherichia coli* host strain TOPP2 (EKLFTAD1, EKLFTAD2, I $\beta$ id domain) or *E. coli* host strain Rosetta2 (EKLFTAD) and bound to glutathione resin. The resin-bound proteins were incubated 2 h with 100 units of thrombin (Calbiochem). Following the cleavage reaction, the proteins were dialyzed overnight into 5% aqueous acetic acid and further purified by reverse-phase HPLC over a C4 column (Vydac). The his-tagged KIX domain of CBP was first bound with chelating sepharose FF resin (GE Healthcare) charged with nickel, and the CBP-KIX protein was eluted with imidazole buffer [20 mM phosphate buffer-HCl (pH 7.4), 500 mM imidazol, 0.5 M NaCl]. The eluted protein was dialyzed overnight into 10% aqueous acetic acid and further purified by reverse-phase HPLC over a C4 column (Vydac).

The TAZ1 and TAZ2 domains of CBP were expressed in *E. coli* host strain BL21(DE3). The cells were grown at 37 °C, and protein expression was induced for 4 h with 0.7 mM IPTG at 37 °C. Cells were harvested, resuspended in buffer A [26 mM Tris buffer pH 7.4, 1 mM DTT], lysed by passage through a French press, and centrifuged at 15,000  $\times g$  for 20 min. The pellets from the centrifugation were then resuspended in buffer A with 6 M guanidinium HCl and centrifuged at 100,000  $\times g$  for 30 min. The supernatants were then dialyzed overnight into 5% aqueous acetic acid containing 2 mM DTT. The proteins were further purified by reverse-phase HPLC over a C4 column (Vydac). For NMR studies, uniformly (>98%)  $^{15}\text{N}$ -labeled and  $^{15}\text{N}/^{13}\text{C}$ -labeled proteins were prepared in minimal media.

**GAL4 Transactivation Assays in Yeast.** Transactivation assays in yeast were performed as previously described (1). The results are pre-

sented as the mean of the percentage of the  $\beta$ -galactosidase units of the tested LexA-fusion proteins on the  $\beta$ -galactosidase units of the LexA-GAL4 positive control  $\pm$  standard of the mean. Western-blot analyses were performed with an antibody directed at the LexA protein (Santa Cruz, sc-7544; 1:1,000 dilution) to verify equivalent expression of the LexA-fusion proteins.

**NMR Samples.** For structural studies of the Tfb1PH/EKLFTAD2 complex, the samples contained 1 mM  $^{15}\text{N}$ - or  $^{15}\text{N}/^{13}\text{C}$ -labeled Tfb1PH and EKLFTAD2 was added to a final ratio of 1:2. These studies were performed in 20 mM sodium phosphate buffer pH 6.5, 1 mM EDTA, 1 mM DTT (NMR buffer) with either 90% $\text{H}_2\text{O}/10\%\text{D}_2\text{O}$  or 99.9%  $\text{D}_2\text{O}$ . For the labeled EKLf experiments, the samples contained 0.6 mM  $^{15}\text{N}$ - or  $^{15}\text{N}/^{13}\text{C}$ -labeled EKLFTAD2, and Tfb1PH was added to a final ratio of 1:2 in NMR buffer.

For the NMR chemical shift titration studies of EKLFTADs with Tfb1PH, either unlabeled EKLFTAD1 or unlabeled EKLFTAD2 was added to a sample containing 0.5 mM of  $^{15}\text{N}$ -Tfb1PH in NMR buffer to a final ratio of 2:1. For the NMR chemical shift titration studies of EKLFTAD2 on p62PH, unlabeled EKLFTAD2 was added to a final ratio of 1:1.5 to a sample containing 0.4 mM of  $^{15}\text{N}$ -p62PH in NMR buffer.

For the NMR competition experiment, a sample containing 0.5 mM  $^{15}\text{N}$ -labeled p53TAD2 (residues 40–73) in NMR buffer was used. To this sample, unlabeled Tfb1PH was added to a final concentration of 0.4 mM. In a second addition, unlabeled EKLFTAD2 was added to a final concentration of 0.5 mM.

**GAL4 Transactivation Assays in K562 Blood Cells.** Luciferase assays in K562 blood cells were performed as described previously (2, 3). The minimal EKLFTAD (residues 2–106 of mouse EKLf) was fused to the DNA-binding domain of GAL4 (4) to create the GAL4-fusion proteins. The W73 are based on the numbering of the equivalent tryptophan residue in humans. Western-blot analysis with an antibody directed at the GAL4 protein is used to verify expression levels of the GAL-4 fusion protein.

1. Di Lello P, et al. (2008) p53 and TFII $\alpha$  share a common binding site on the Tfb1/p62 subunit of TFIIH. *Proc Natl Acad Sci USA* 105:106–111.
2. Sengupta T, Cohet N, Morle F, Bieker JJ (2009) Distinct modes of gene regulation by a cell-specific transcriptional activator. *Proc Natl Acad Sci USA* 106:4213–4218.

3. Chen XY, Bieker JJ (2004) Stage-specific repression by the EKLf transcriptional activator. *Mol Cell Biol* 24:10416–10424.
4. Chen X, Bieker JJ (1996) Erythroid Krueppel-like factor (EKLf) contains a multifunctional transcriptional activation domain important for inter- and intramolecular interactions. *EMBO J* 15:5888–5896.
